# Supplementary material for: Synthesis and coordination of a hybrid phosphinoferrocene sulfonamide ligand
Source: Royal Society of Chemistry journal article supplement (doi:10.1039/d1nj00080b), 2021-01-01
Supplement: d1nj00080b1.pdf [file d1nj00080b1.pdf]

## Synthesis and coordination of a hybrid phosphinoferrocene sulfonamide ligand

Věra Varmužová, Filip Horký and Petr Štěpnička\*

### SUPPORTING INFORMATION

#### Contents

|                                                                    |     |
|--------------------------------------------------------------------|-----|
| Additional structural diagrams                                     | S-2 |
| Selected crystallographic data and structure refinement parameters | S-7 |
| Copies of the NMR spectra                                          | S-9 |

## Additional structural diagrams

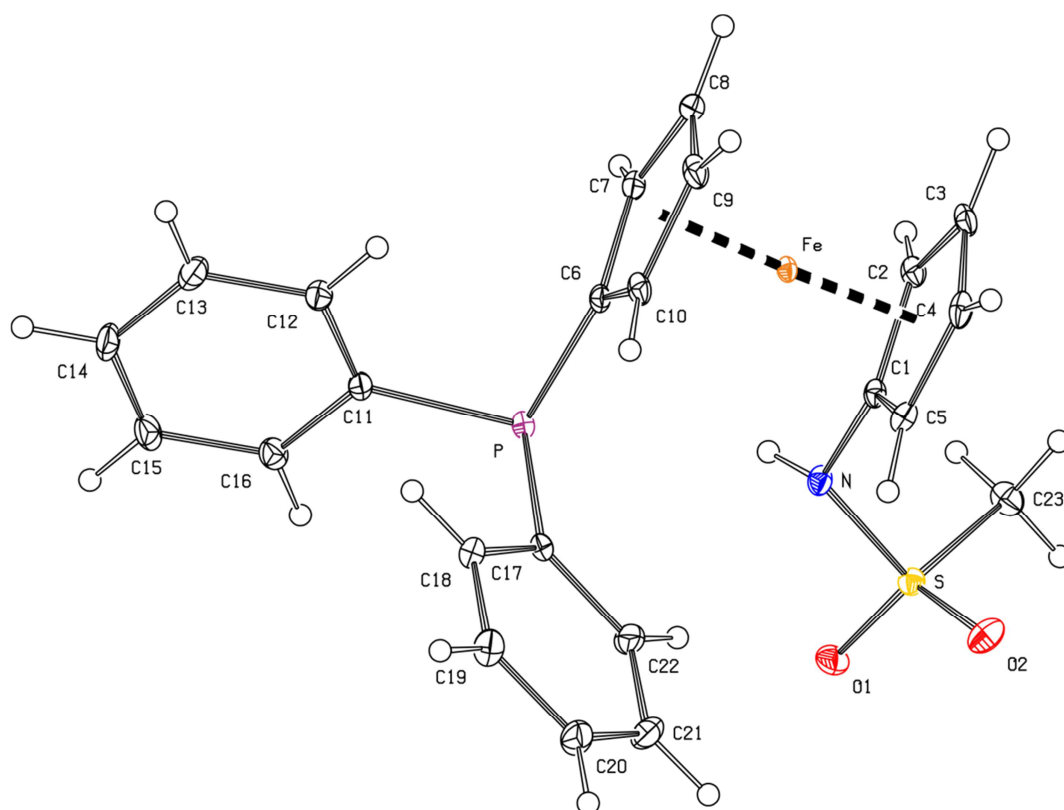

**Figure S1.** PLATON plot of the molecular structure of **1** showing displacement ellipsoids at the 30% probability level.

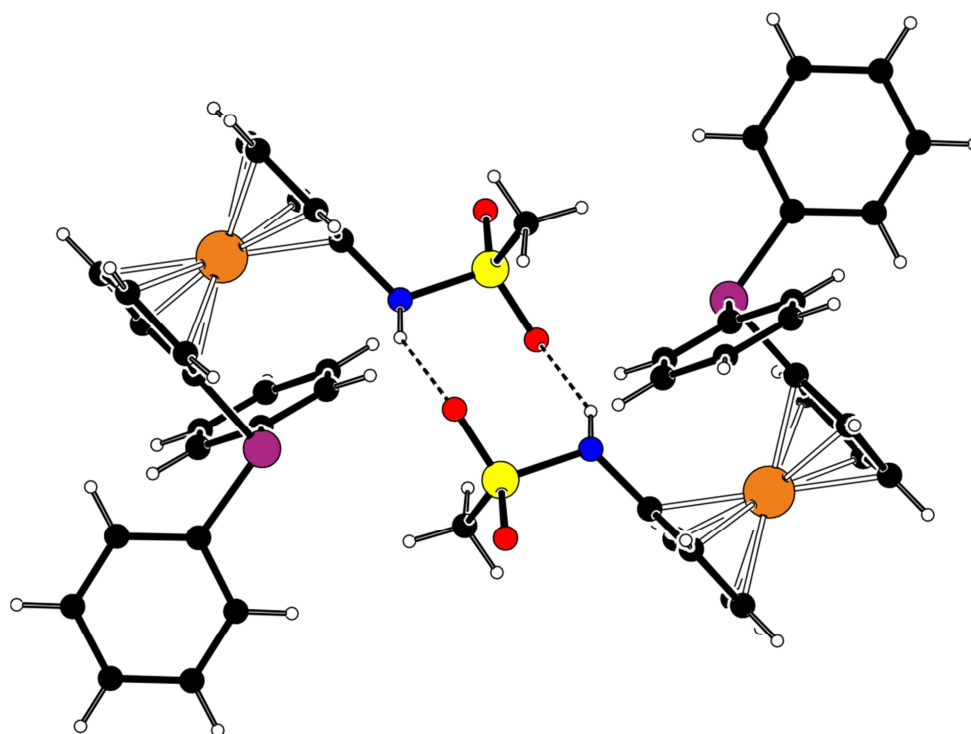

**Figure S2.** View of the hydrogen-bonded dimeric motif in the structure of **1**.

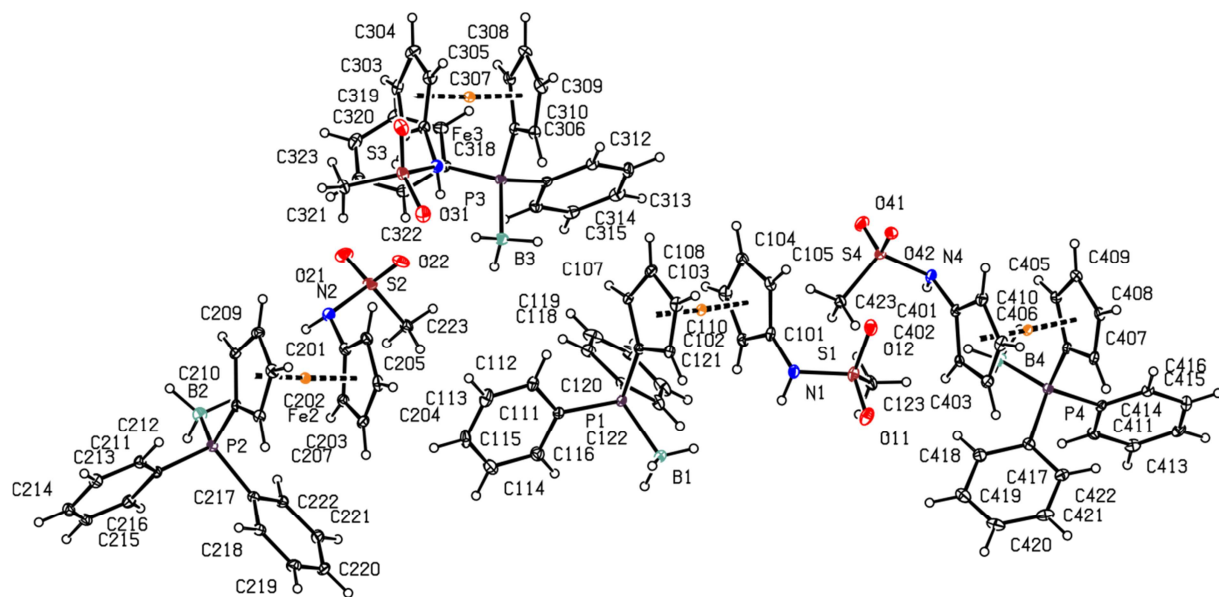

**Figure S3.** PLATON plot of the four independent molecules in the crystal structure of **2** at the 30% probability level.

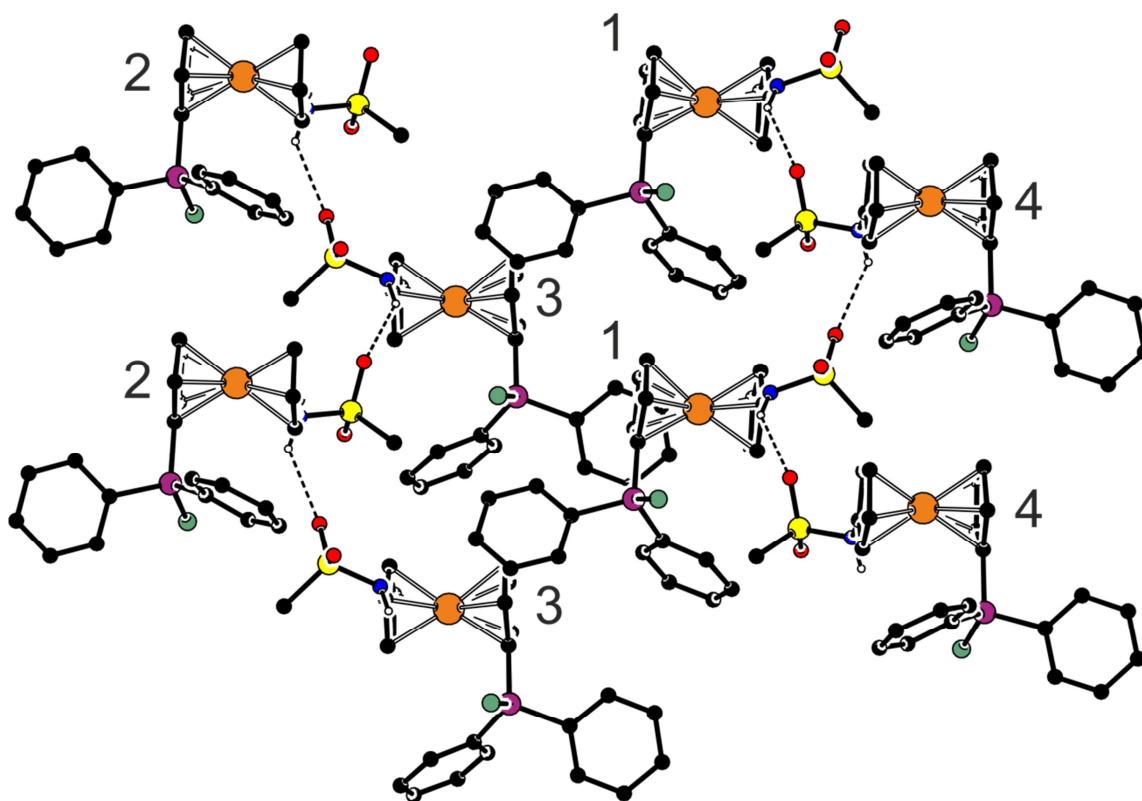

**Figure S4.** Section of the hydrogen-bonded chains in the structure of **2** (only the NH hydrogens are shown for clarity and hydrogen bonds are indicated by dashed lines). The independent molecules are distinguished by numbers.

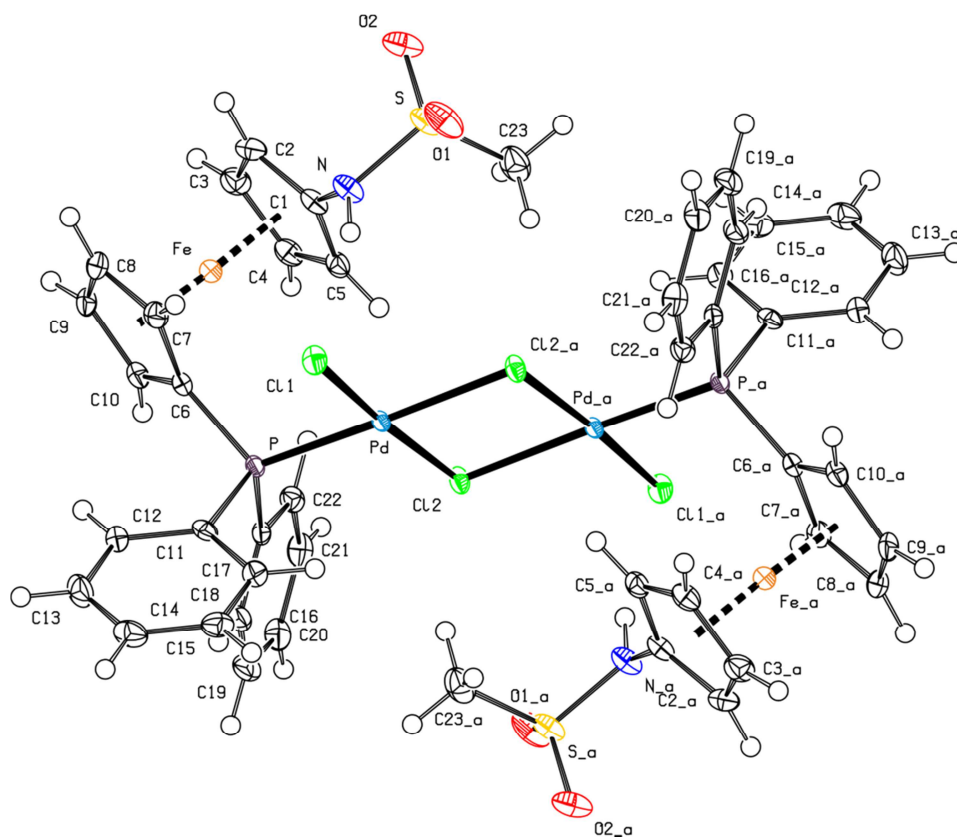

**Figure S5.** PLATON plot of the complex molecule in the structure of  $4 \cdot 2\text{CHCl}_3$  with 30% probability ellipsoids (Note: the half of the molecule is generated by crystallographic inversion).

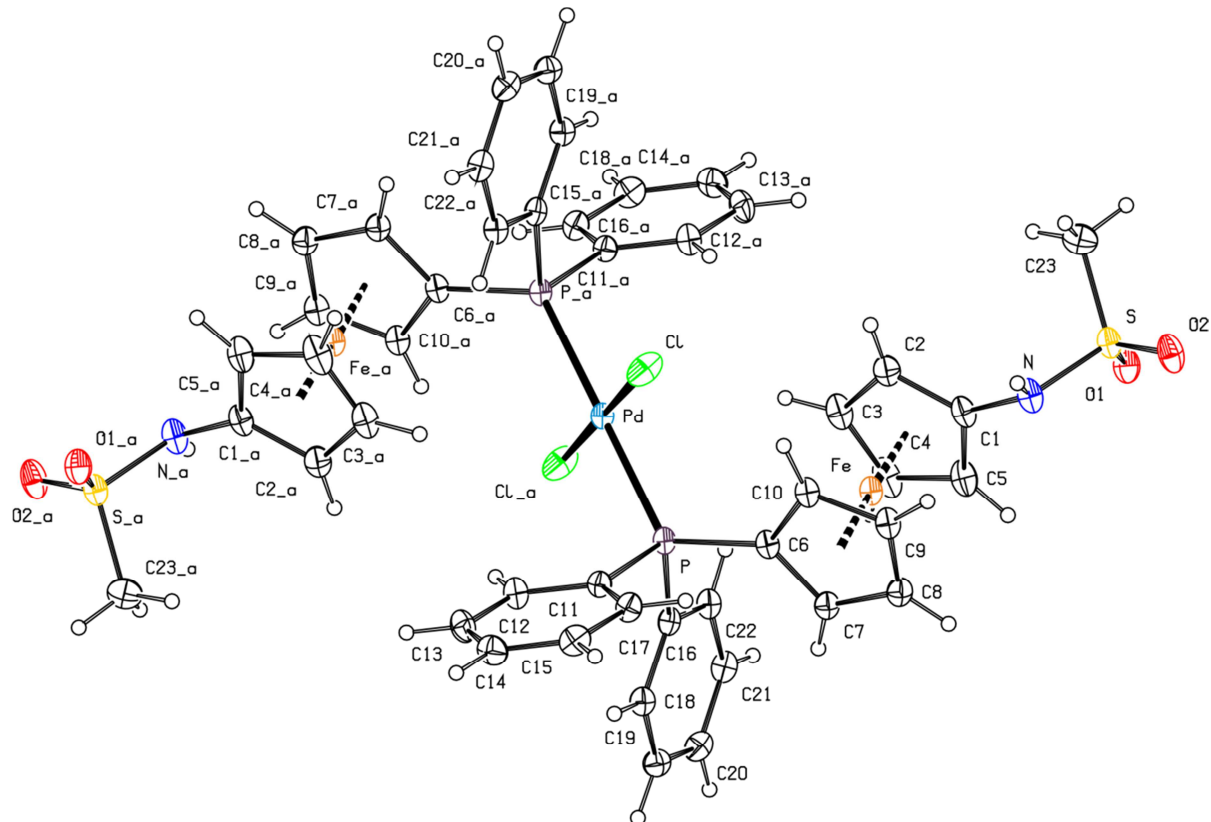

**Figure S6.** PLATON plot of the molecular structure of **5** showing 30% probability ellipsoids (Note: the half of the molecule is generated by crystallographic inversion).

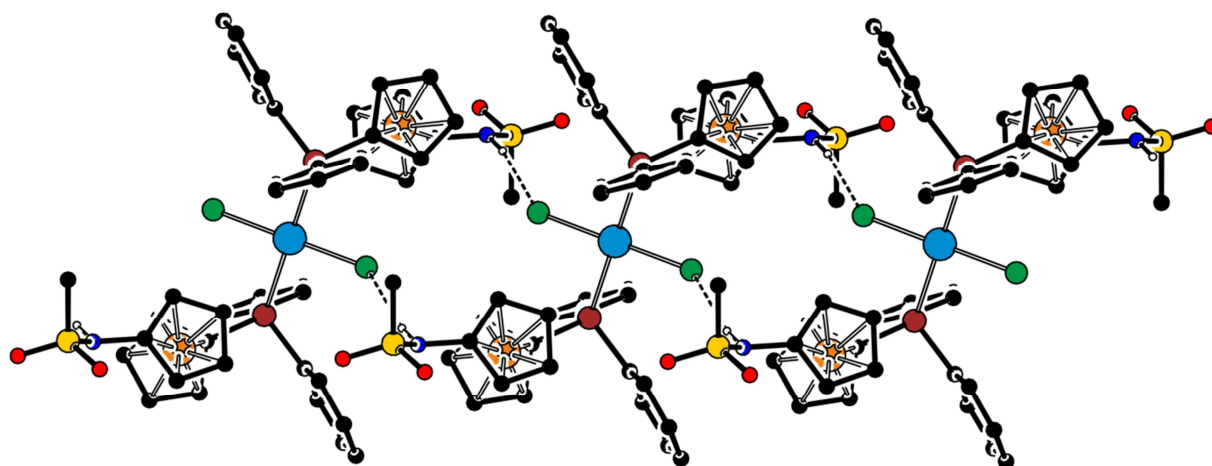

**Figure S7.** Section of the infinite, hydrogen-bonded chain in the structure of **5**.

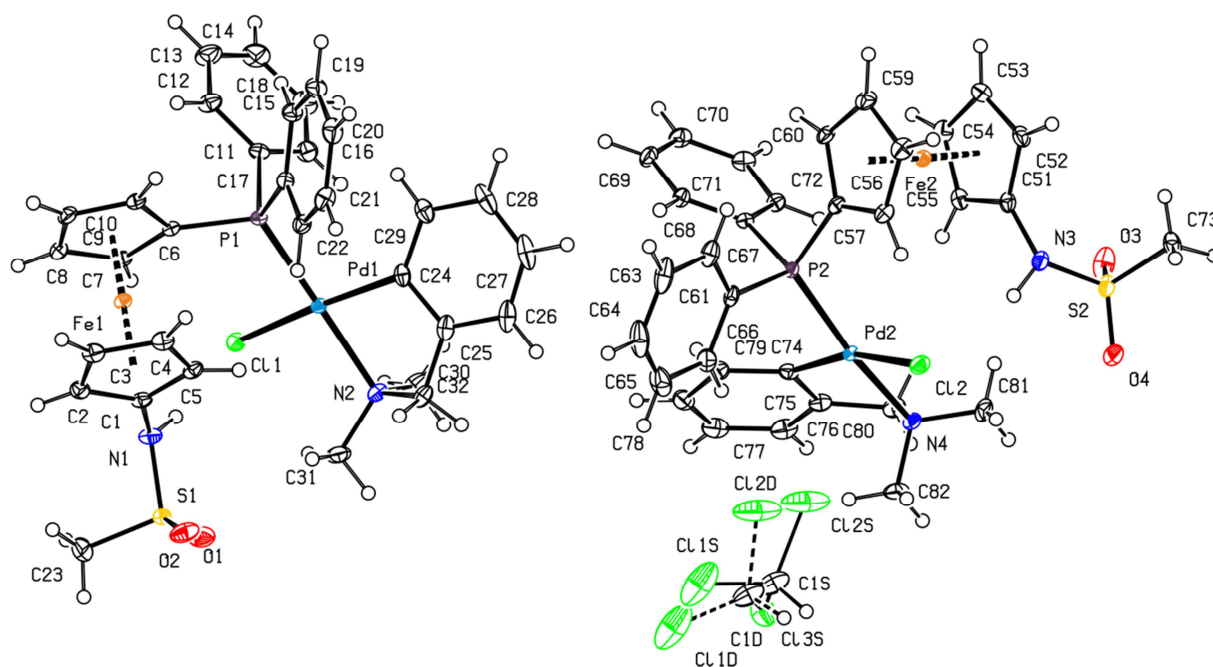

**Figure S8.** PLATON plot of the molecular structure of **6** ·  $\frac{1}{2}$ CHCl<sub>3</sub> (30% probability ellipsoids).

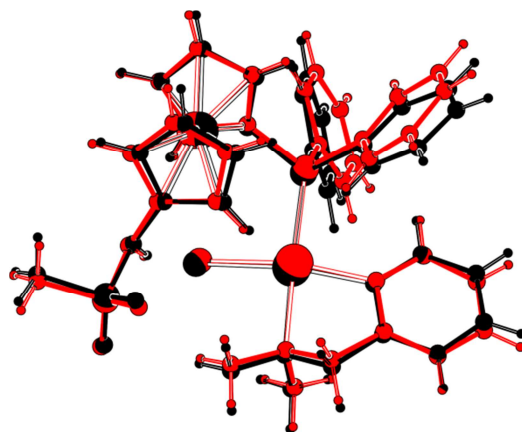

**Figure S9.** Least-squares overlap of the independent molecules in the structure of **6** ·  $\frac{1}{2}$ CHCl<sub>3</sub>.

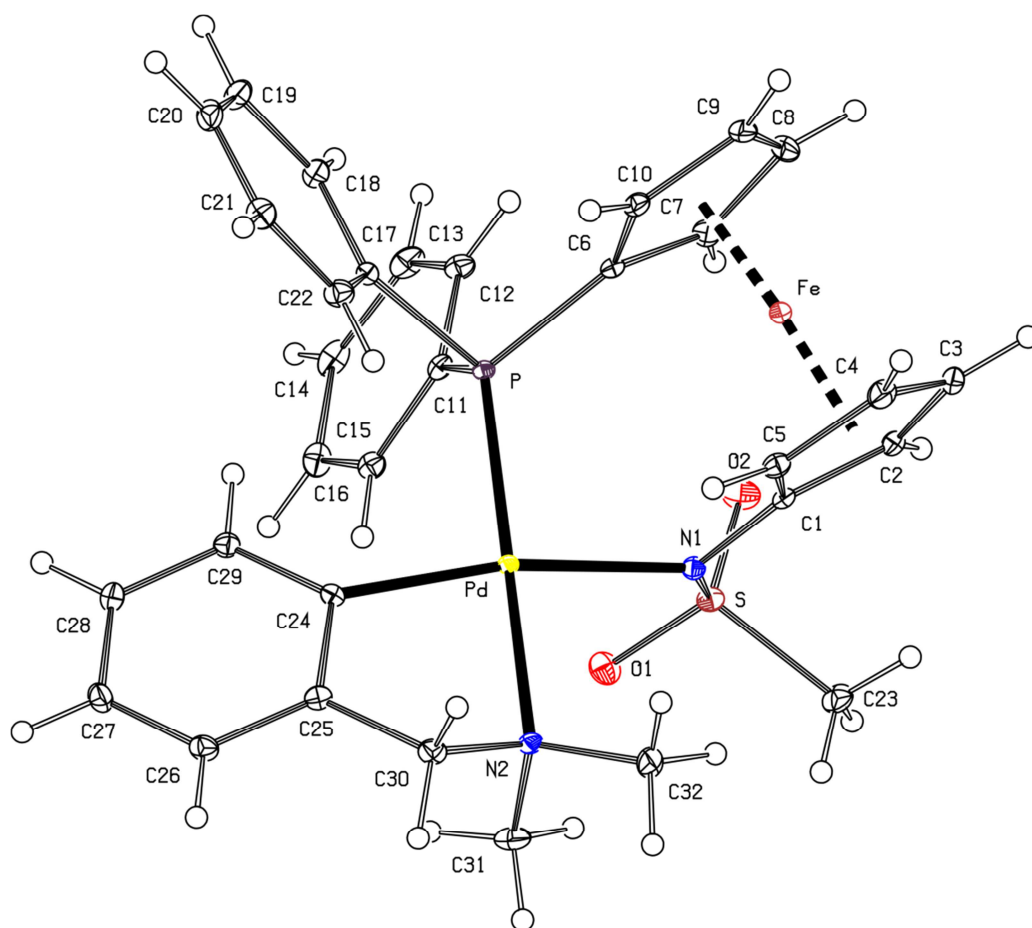

**Figure S10.** PLATON plot of the molecular structure of **7** (displacement ellipsoids enclose the 30% probability level).

**Table S1** Selected crystallographic data and structure refinement parameters<sup>a</sup>

| Compound                                       | <b>1</b>                                             | <b>2</b>                                              | <b>4·2CHCl<sub>3</sub></b>                                                                                                                   |
|------------------------------------------------|------------------------------------------------------|-------------------------------------------------------|----------------------------------------------------------------------------------------------------------------------------------------------|
| Formula                                        | C <sub>23</sub> H <sub>22</sub> FeNO <sub>2</sub> PS | C <sub>23</sub> H <sub>25</sub> BFeNO <sub>2</sub> PS | C <sub>48</sub> H <sub>46</sub> Cl <sub>10</sub> Fe <sub>2</sub> N <sub>2</sub> O <sub>4</sub> P <sub>2</sub> Pd <sub>2</sub> S <sub>2</sub> |
| <i>M</i>                                       | 463.29                                               | 477.13                                                | 1519.93                                                                                                                                      |
| Crystal system                                 | triclinic                                            | orthorhombic                                          | triclinic                                                                                                                                    |
| Space group                                    | <i>P</i> -1 (no. 2)                                  | <i>Pca</i> 2 <sub>1</sub> (no. 29) <sup>d</sup>       | <i>P</i> -1 (no. 2)                                                                                                                          |
| <i>T</i> (K)                                   | 120(2)                                               | 120(2)                                                | 120(2)                                                                                                                                       |
| <i>a</i> [Å]                                   | 8.8310(5)                                            | 18.5588(9)                                            | 10.8367(6)                                                                                                                                   |
| <i>b</i> [Å]                                   | 9.6737(5)                                            | 9.0762(4)                                             | 11.5827(7)                                                                                                                                   |
| <i>c</i> [Å]                                   | 12.2527(6)                                           | 51.788(3)                                             | 11.5985(7)                                                                                                                                   |
| α [°]                                          | 99.502(2)                                            | 90                                                    | 84.816(2)                                                                                                                                    |
| β [°]                                          | 95.461(2)                                            | 90                                                    | 75.910(2)                                                                                                                                    |
| γ [°]                                          | 91.567(2)                                            | 90                                                    | 79.007(2)                                                                                                                                    |
| <i>V</i> [Å <sup>3</sup> ]                     | 1026.69(9)                                           | 8723.3(7)                                             | 1384.6(1)                                                                                                                                    |
| <i>Z</i>                                       | 2                                                    | 16                                                    | 1                                                                                                                                            |
| μ(Mo Kα) [mm <sup>-1</sup> ]                   | 0.934                                                | 7.292                                                 | 1.814                                                                                                                                        |
| Diffns collected                               | 20233                                                | 67871                                                 | 27631                                                                                                                                        |
| Independent diffns                             | 4736                                                 | 16364                                                 | 6372                                                                                                                                         |
| Observed <sup>a</sup> diffns                   | 4343                                                 | 15405                                                 | 5698                                                                                                                                         |
| <i>R</i> <sub>int</sub> <sup>b</sup> [%]       | 2.20                                                 | 3.68                                                  | 2.41                                                                                                                                         |
| No. of parameters                              | 264                                                  | 1085                                                  | 326                                                                                                                                          |
| <i>R</i> <sup>c</sup> obsd diffns [%]          | 2.49                                                 | 3.19                                                  | 2.49                                                                                                                                         |
| <i>R</i> , <i>wR</i> <sup>c</sup> all data [%] | 2.89, 6.34                                           | 3.45, 7.98                                            | 3.03, 5.73                                                                                                                                   |
| Δρ [e Å <sup>-3</sup> ]                        | 0.61, -0.50                                          | 0.45, -0.43                                           | 0.80, -0.64                                                                                                                                  |

<sup>a</sup> Diffractions with  $I > 2\sigma(I)$ . <sup>b</sup> Definitions:  $R_{\text{int}} = \Sigma |F_o^2 - F_o^2(\text{mean})| / \Sigma F_o^2$ , where  $F_o^2(\text{mean})$  denoted the average intensity of symmetry-equivalent diffractions. <sup>c</sup>  $R = \Sigma ||F_o| - |F_c|| / \Sigma |F_o|$ ,  $wR = [\Sigma \{w(F_o^2 - F_c^2)^2\} / \Sigma w(F_o^2)^2]^{1/2}$ . <sup>d</sup> Flack's enantiomorph parameter: 0.008(2).

**Table S1 continued**

| Compound                                       | 5                                                                                                                             | 6·½CHCl <sub>3</sub>                                                                       | 7                                                                    |
|------------------------------------------------|-------------------------------------------------------------------------------------------------------------------------------|--------------------------------------------------------------------------------------------|----------------------------------------------------------------------|
| Formula                                        | C <sub>46</sub> H <sub>44</sub> Cl <sub>2</sub> Fe <sub>2</sub> N <sub>2</sub> O <sub>4</sub> P <sub>2</sub> PdS <sub>2</sub> | C <sub>32.5</sub> H <sub>34.5</sub> Cl <sub>2.5</sub> FeN <sub>2</sub> O <sub>2</sub> PPdS | C <sub>32</sub> H <sub>33</sub> FeN <sub>2</sub> O <sub>2</sub> PPdS |
| <i>M</i>                                       | 1103.89                                                                                                                       | 799.02                                                                                     | 702.88                                                               |
| Crystal system                                 | <i>P</i> -1 (no. 2)                                                                                                           | <i>P</i> -1 (no. 2)                                                                        | <i>P</i> 2 <sub>1</sub> / <i>n</i> (no. 14)                          |
| Space group                                    | triclinic                                                                                                                     | triclinic                                                                                  | monoclinic                                                           |
| <i>T</i> (K)                                   | 120(2)                                                                                                                        | 120(2)                                                                                     | 120(2)                                                               |
| <i>a</i> [Å]                                   | 8.8684(8)                                                                                                                     | 10.6520(5)                                                                                 | 13.4617(5)                                                           |
| <i>b</i> [Å]                                   | 11.294(1)                                                                                                                     | 16.9584(8)                                                                                 | 13.7207(5)                                                           |
| <i>c</i> [Å]                                   | 12.122(1)                                                                                                                     | 20.2403(9)                                                                                 | 15.3668(7)                                                           |
| α [°]                                          | 101.103(2)                                                                                                                    | 109.208(1)                                                                                 | 90                                                                   |
| β [°]                                          | 93.464(2)                                                                                                                     | 101.163(2)                                                                                 | 94.062(1)                                                            |
| γ [°]                                          | 105.757(2)                                                                                                                    | 100.816(2)                                                                                 | 90                                                                   |
| <i>V</i> [Å <sup>3</sup> ]                     | 1138.4(2)                                                                                                                     | 3260.3(3)                                                                                  | 2831.2(2)                                                            |
| <i>Z</i>                                       | 1                                                                                                                             | 4                                                                                          | 4                                                                    |
| μ(Mo Kα) [mm <sup>-1</sup> ]                   | 11.166                                                                                                                        | 1.348                                                                                      | 1.312                                                                |
| Diffns collected                               | 22389                                                                                                                         | 63690                                                                                      | 43435                                                                |
| Independent diffns                             | 4447                                                                                                                          | 14991                                                                                      | 6491                                                                 |
| Observed <sup>a</sup> diffns                   | 4157                                                                                                                          | 13669                                                                                      | 5955                                                                 |
| <i>R</i> <sub>int</sub> <sup>b</sup> [%]       | 4.99                                                                                                                          | 2.06                                                                                       | 2.64                                                                 |
| No. of parameters                              | 278                                                                                                                           | 791                                                                                        | 365                                                                  |
| <i>R</i> <sup>c</sup> obsd diffns [%]          | 3.84                                                                                                                          | 2.67                                                                                       | 1.99                                                                 |
| <i>R</i> , <i>wR</i> <sup>c</sup> all data [%] | 4.08, 10.4                                                                                                                    | 3.09, 6.37                                                                                 | 2.31, 5.12                                                           |
| Δρ [e Å <sup>-3</sup> ]                        | 1.56, -0.90                                                                                                                   | 1.24, -1.47                                                                                | 0.56, -0.56                                                          |



## Copies of the NMR spectra

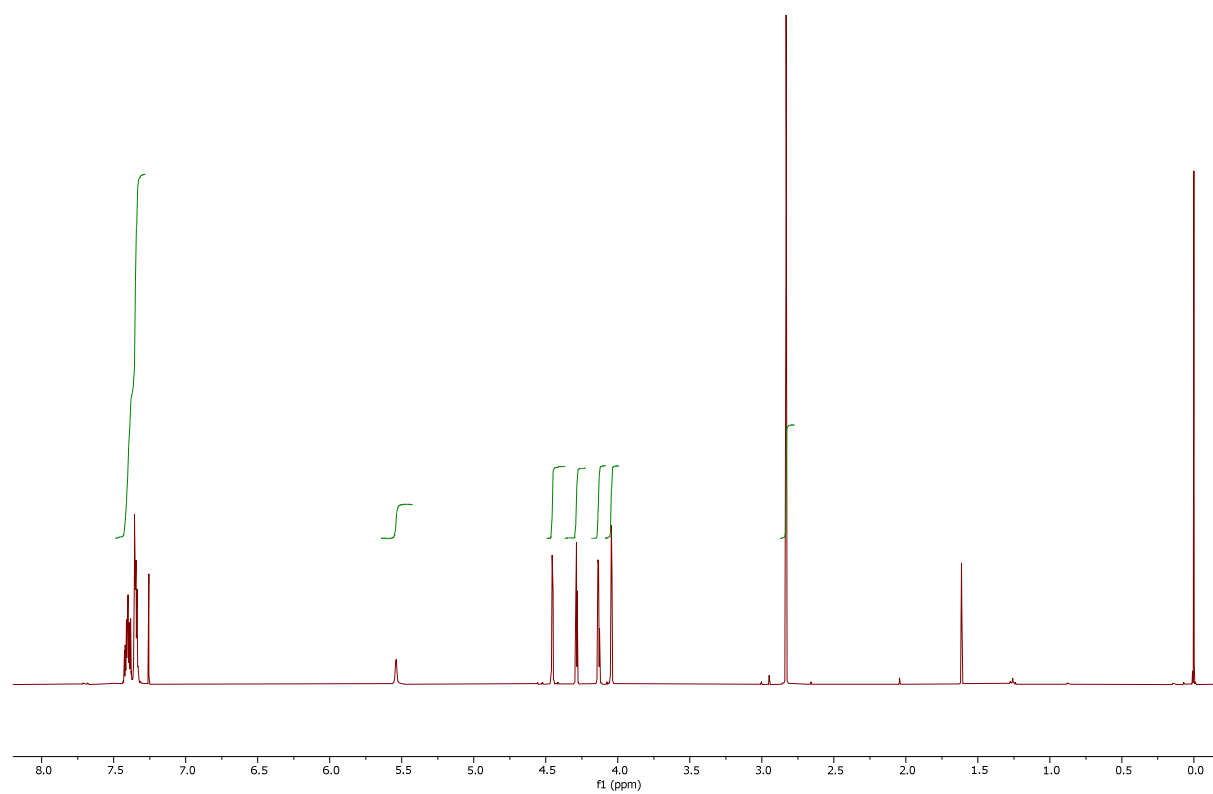

**Figure S11.**  $^1\text{H}$  NMR (400 MHz,  $\text{CDCl}_3$ ) spectrum of **1**.

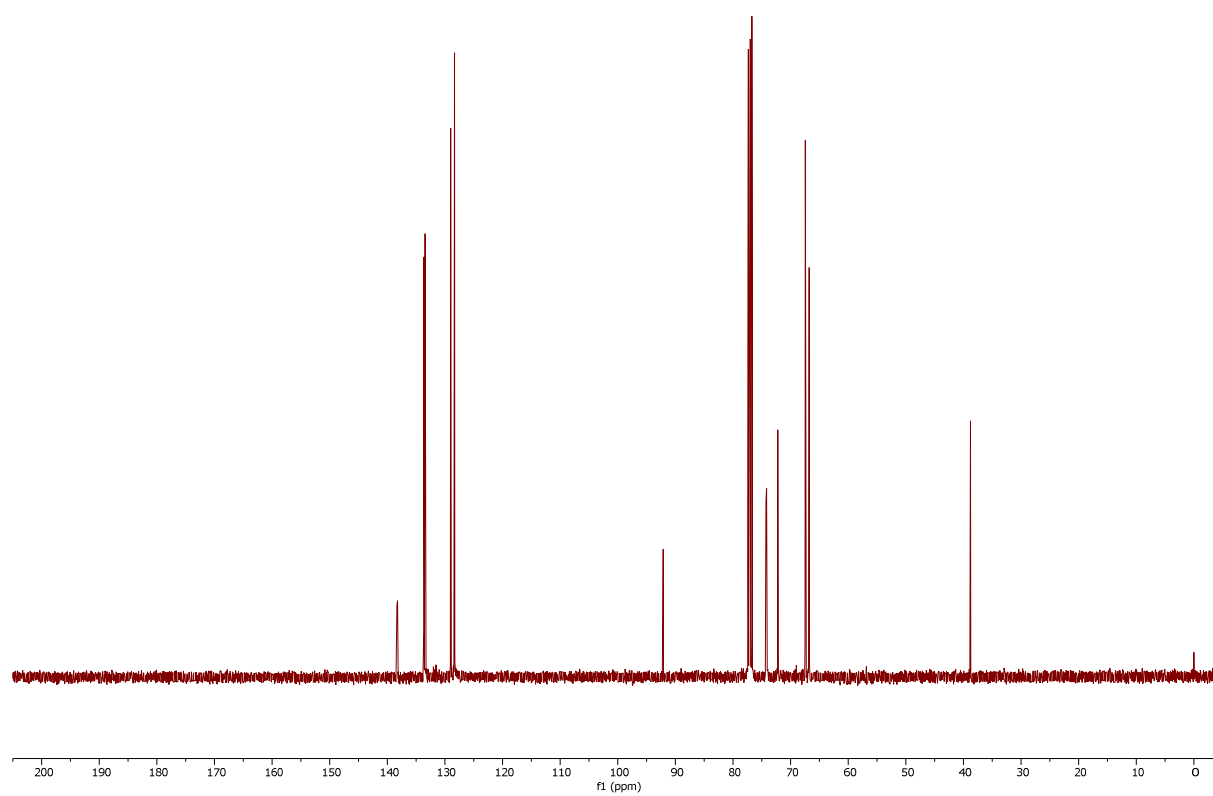

**Figure S12.**  $^{13}\text{C}\{^1\text{H}\}$  NMR (101 MHz,  $\text{CDCl}_3$ ) spectrum of **1**.

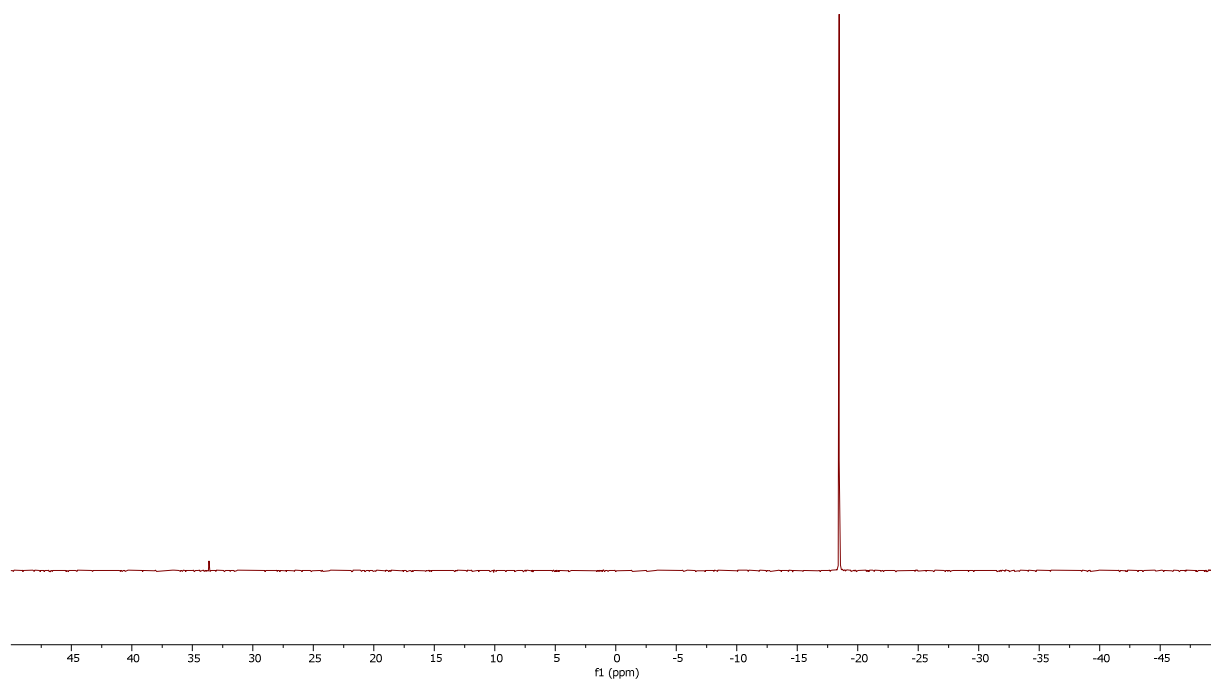

**Figure S13.**  $^{31}\text{P}\{^1\text{H}\}$  NMR (162 MHz,  $\text{CDCl}_3$ ) spectrum of **1**.

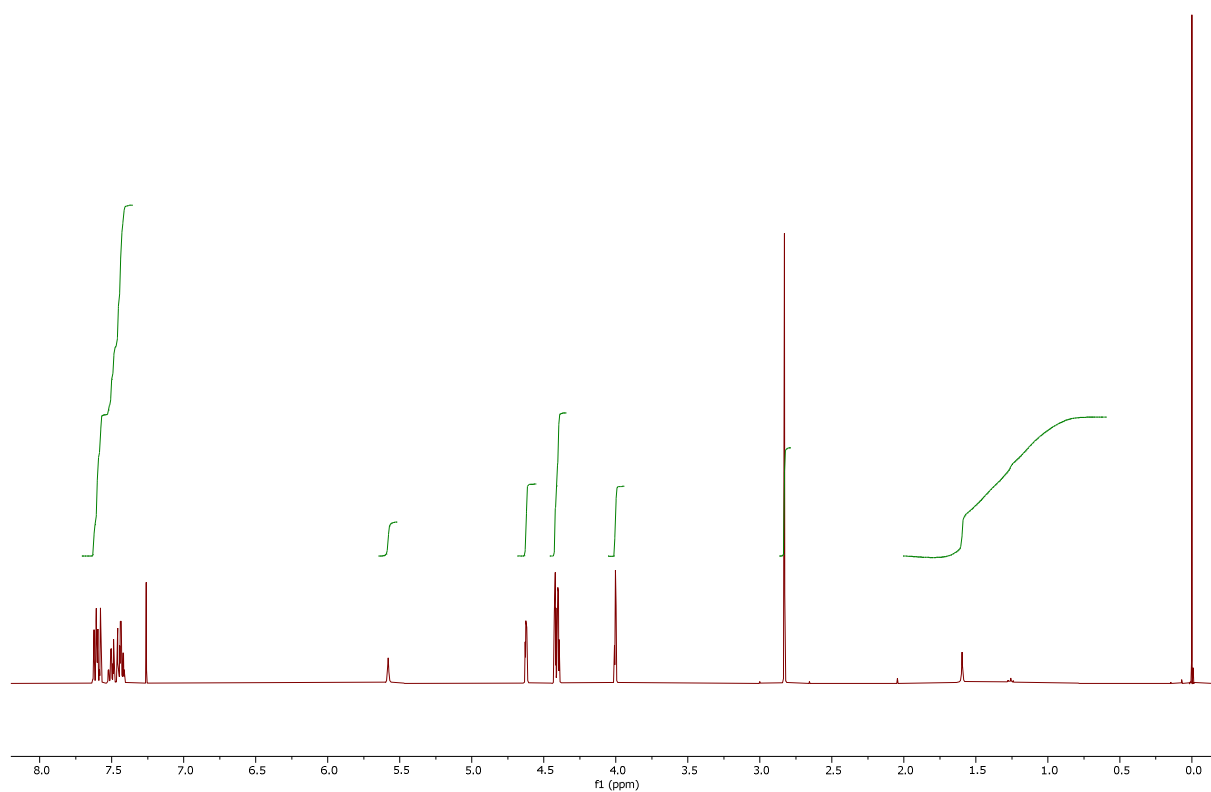

**Figure S14.**  $^1\text{H}$  NMR (400 MHz,  $\text{CDCl}_3$ ) spectrum of **2**.

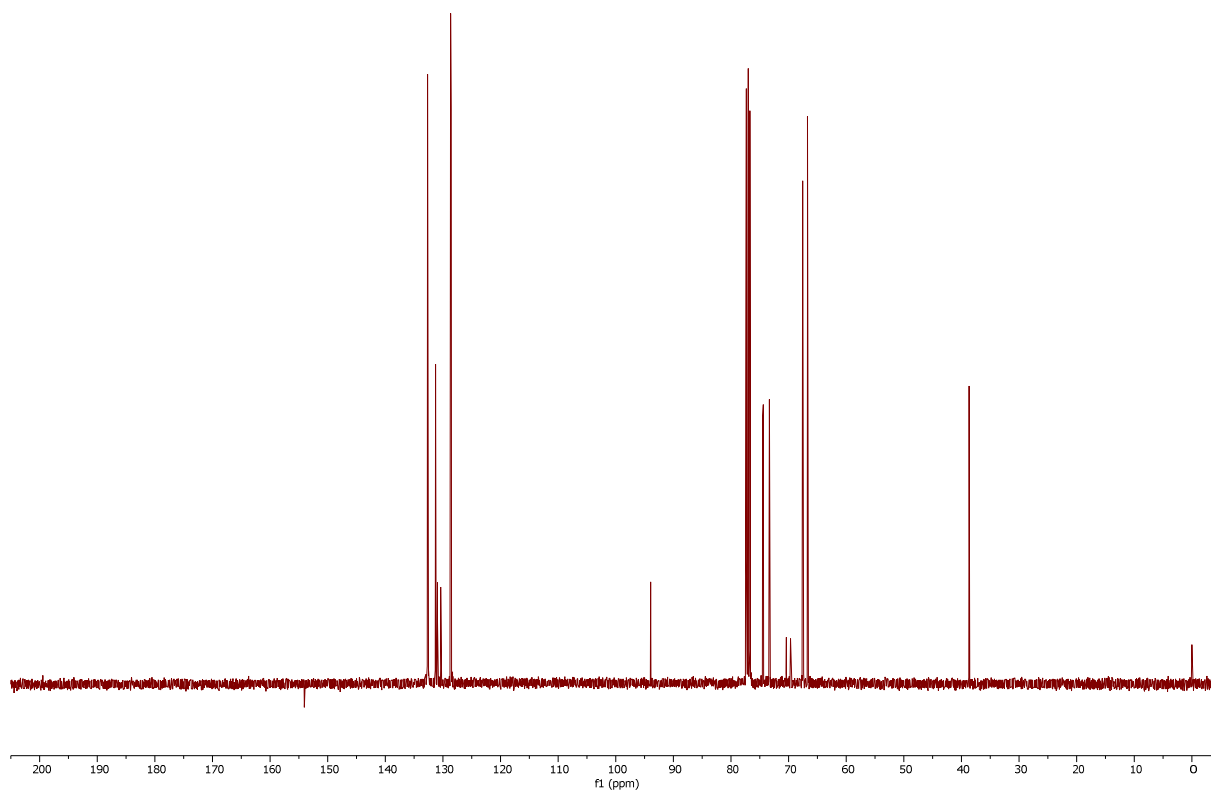

**Figure S15.**  $^{13}\text{C}\{^1\text{H}\}$  NMR (101 MHz,  $\text{CDCl}_3$ ) spectrum of **2**.

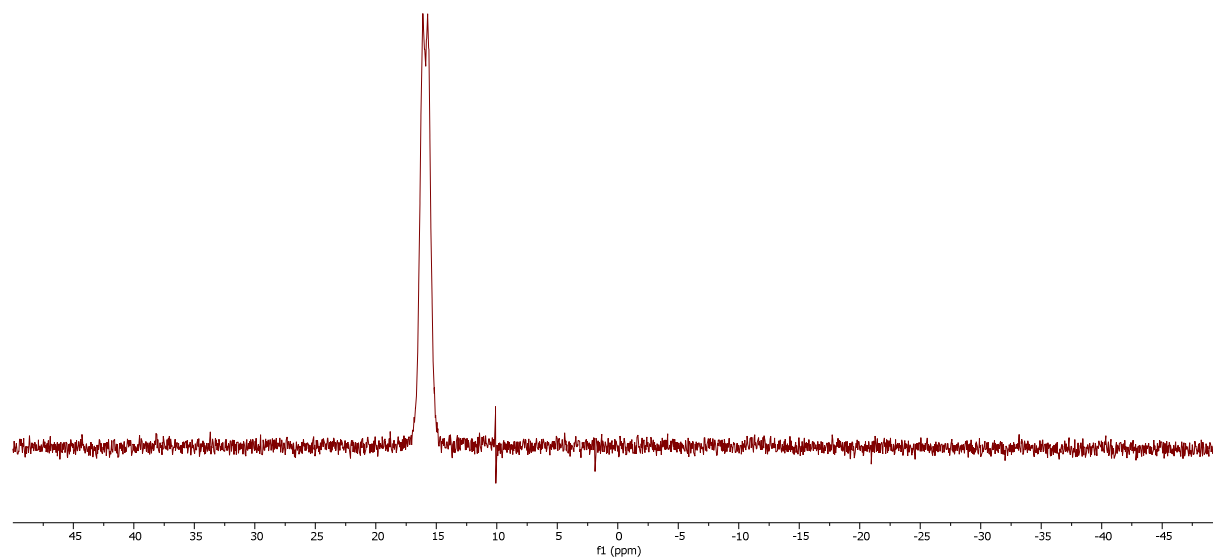

**Figure S16.**  $^{31}\text{P}\{^1\text{H}\}$  NMR (162 MHz,  $\text{CDCl}_3$ ) spectrum of **2**.

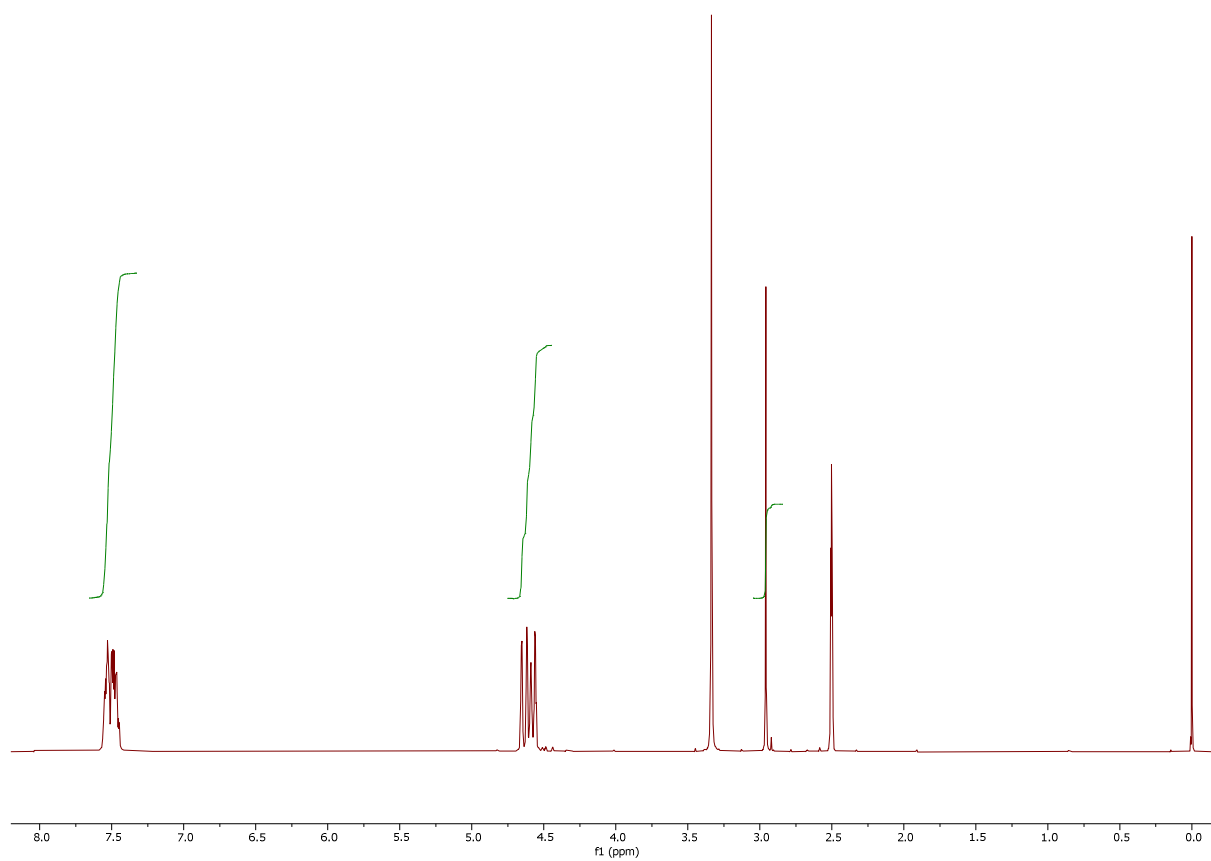

**Figure S17.**  $^1\text{H}$  NMR (400 MHz,  $\text{dms0-d}_6$ ) spectrum of **4**.

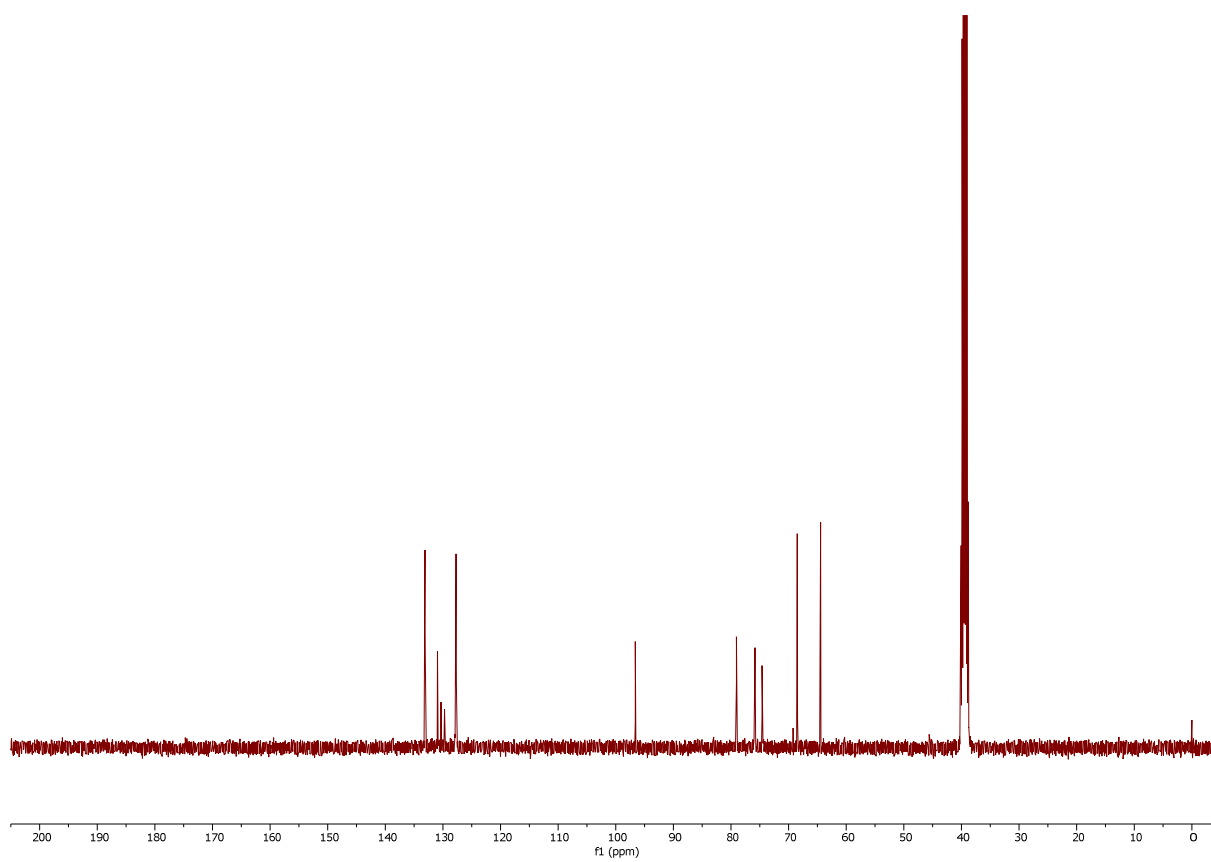

**Figure S18.**  $^{13}\text{C}\{^1\text{H}\}$  NMR (101 MHz,  $\text{dms0-d}_6$ ) spectrum of **4**.

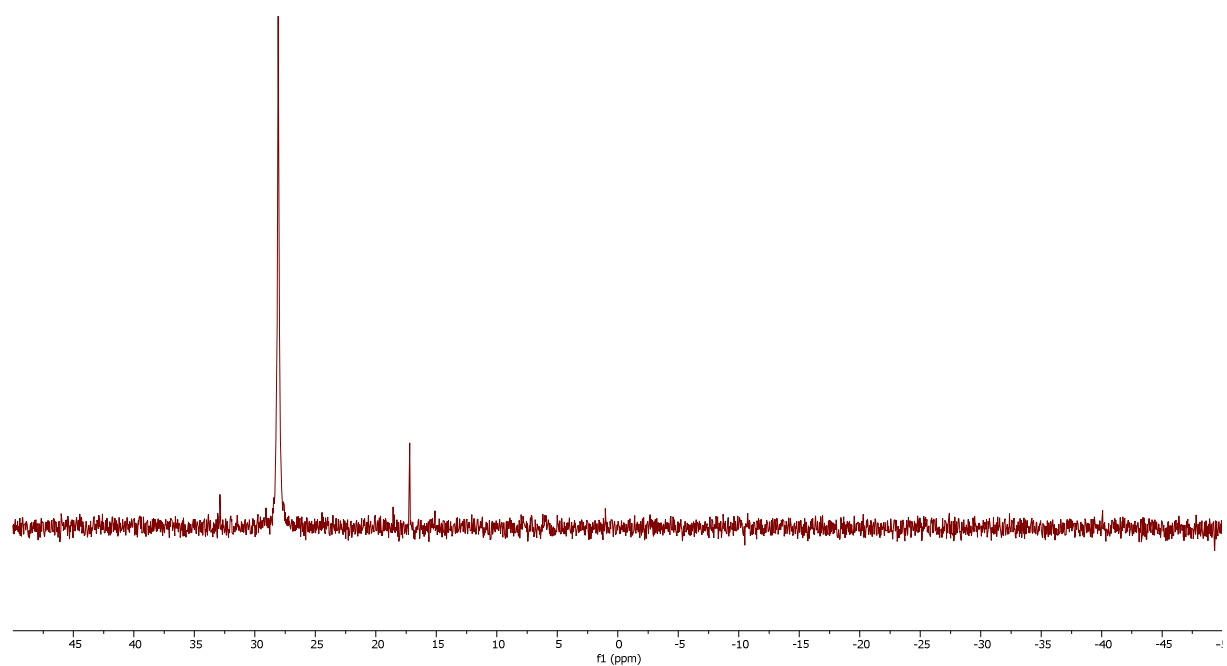

**Figure S19.**  $^{31}\text{P}\{^1\text{H}\}$  NMR (162 MHz,  $\text{dmsso-d}_6$ ) spectrum of **4**.

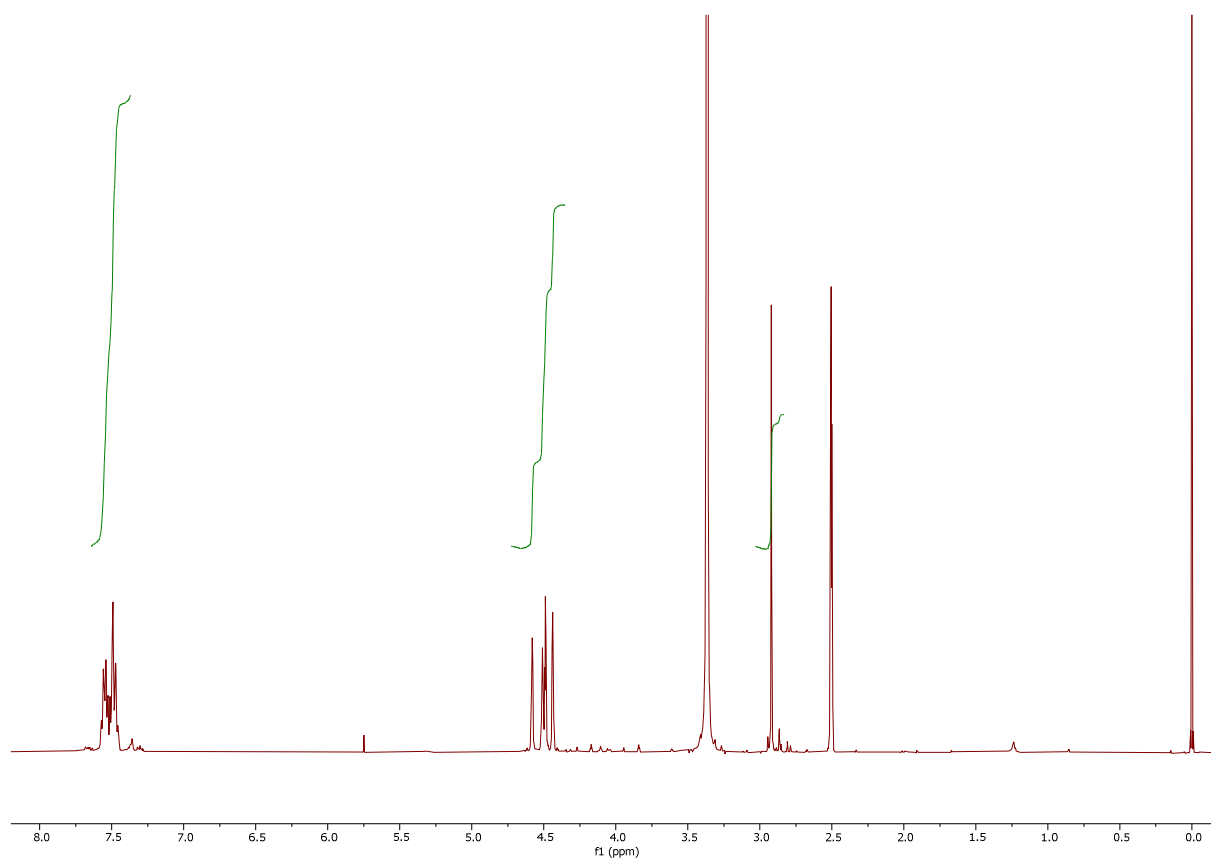

**Figure S20.**  $^1\text{H}$  NMR (400 MHz,  $\text{dms0-d}_6$ ) spectrum of **5**.

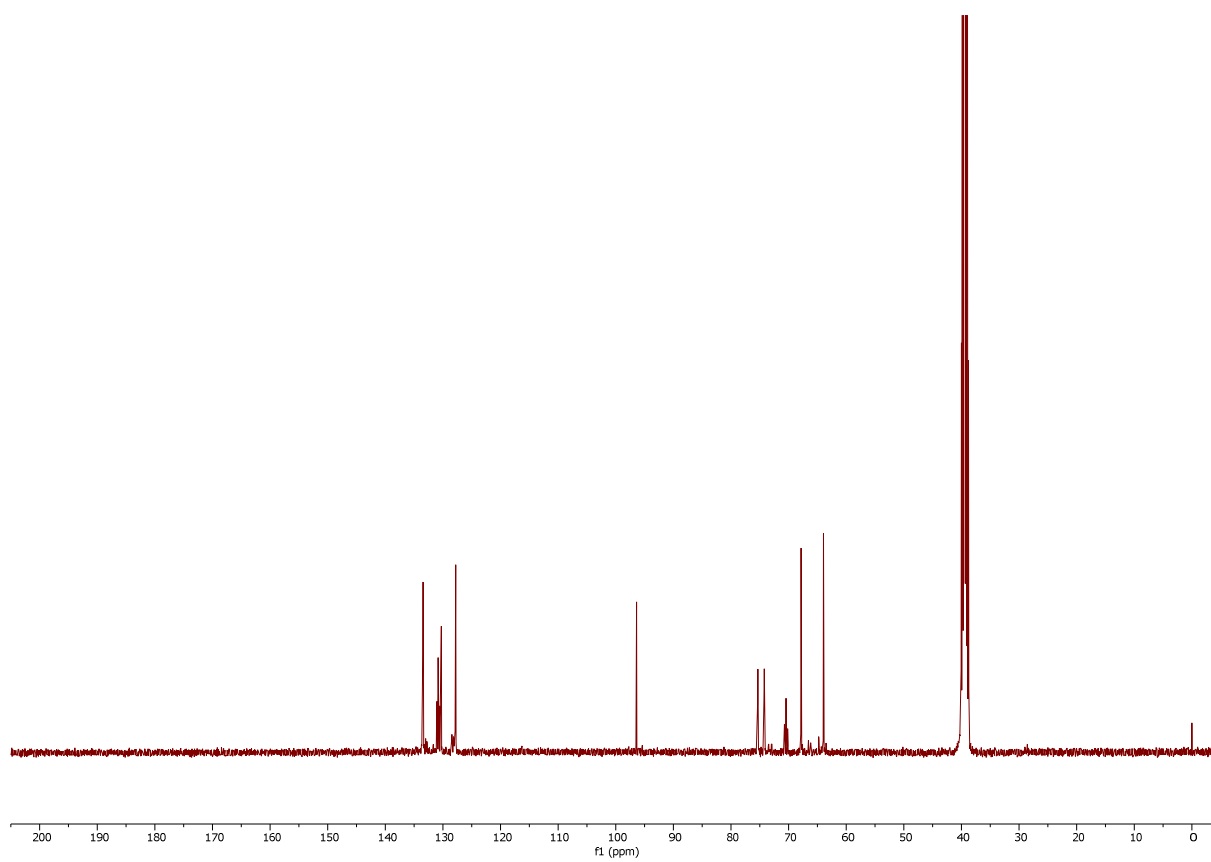

**Figure S21.**  $^{13}\text{C}\{^1\text{H}\}$  NMR (101 MHz,  $\text{dms0-d}_6$ ) spectrum of **5**.

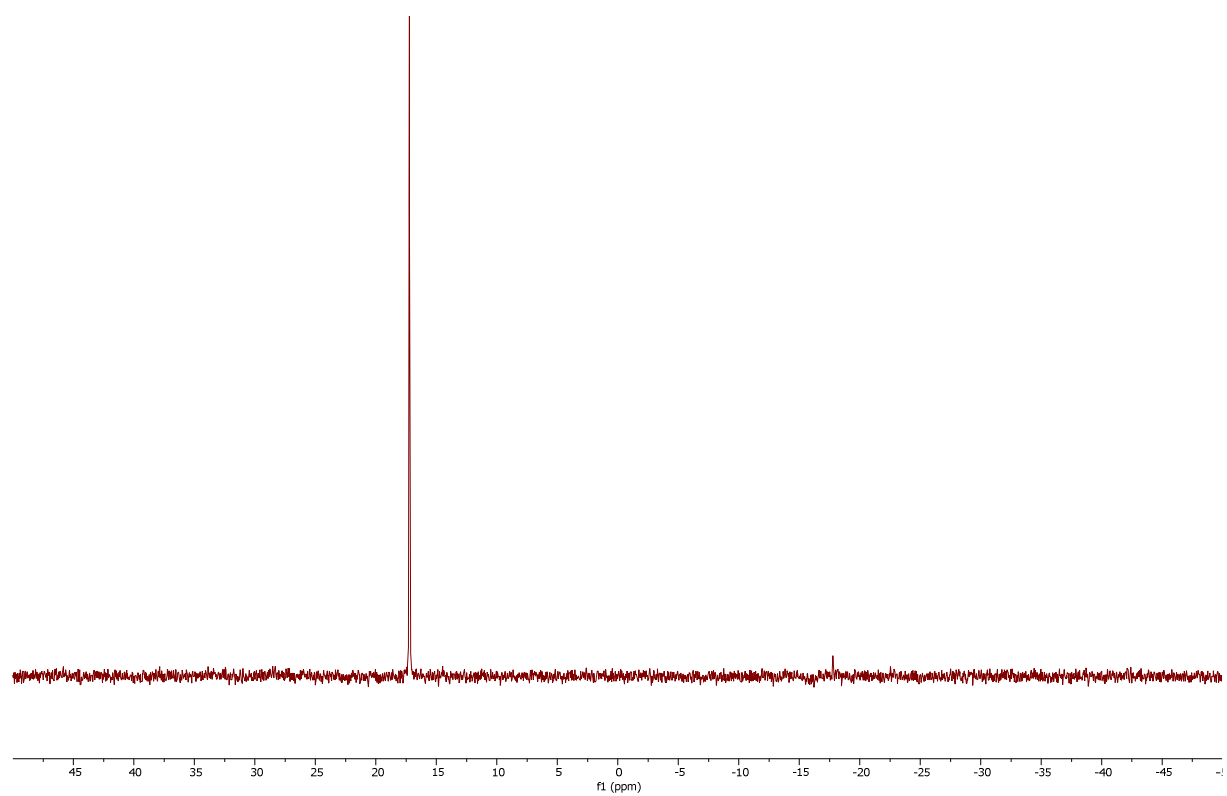

**Figure S22.**  $^{31}\text{P}\{^1\text{H}\}$  NMR (162 MHz,  $\text{dms0-d}_6$ ) spectrum of **5**.



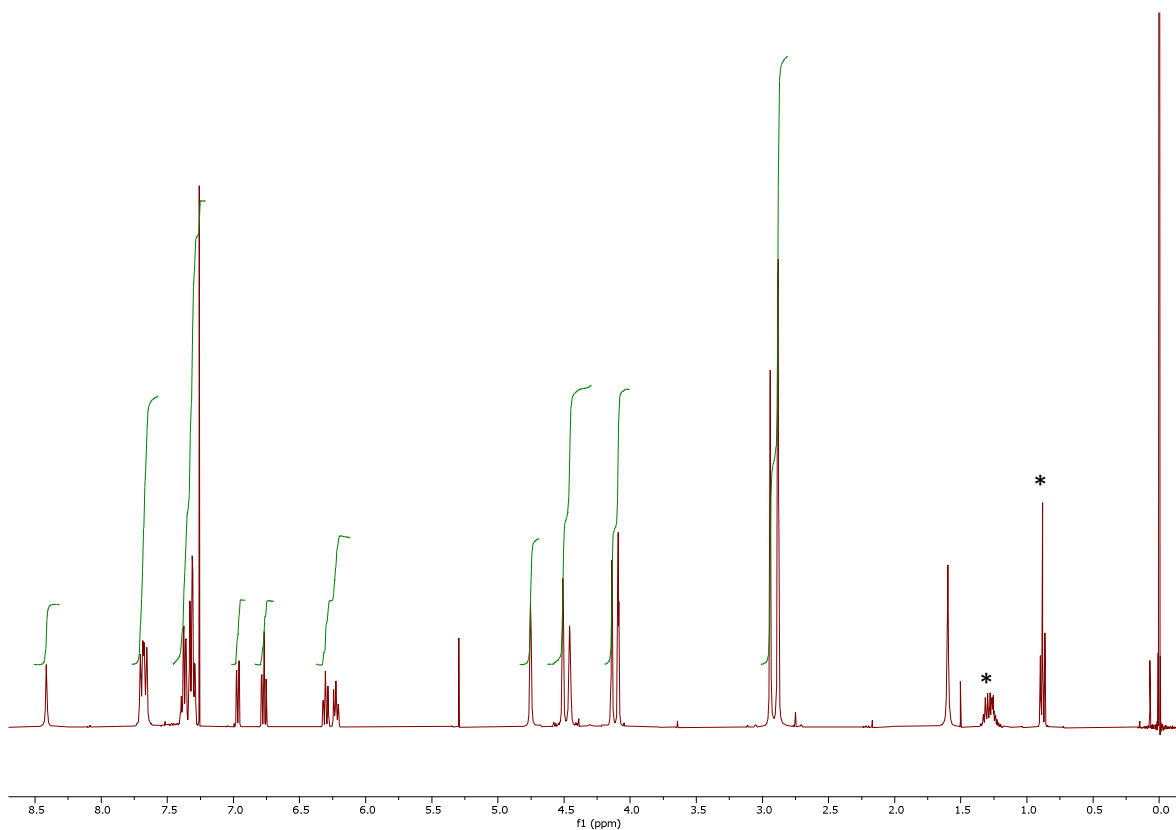

**Figure S23.**  $^1\text{H}$  NMR (400 MHz,  $\text{CDCl}_3$ ) spectrum of **6** (signals marked with \* are due to residual pentane used to precipitate the product).

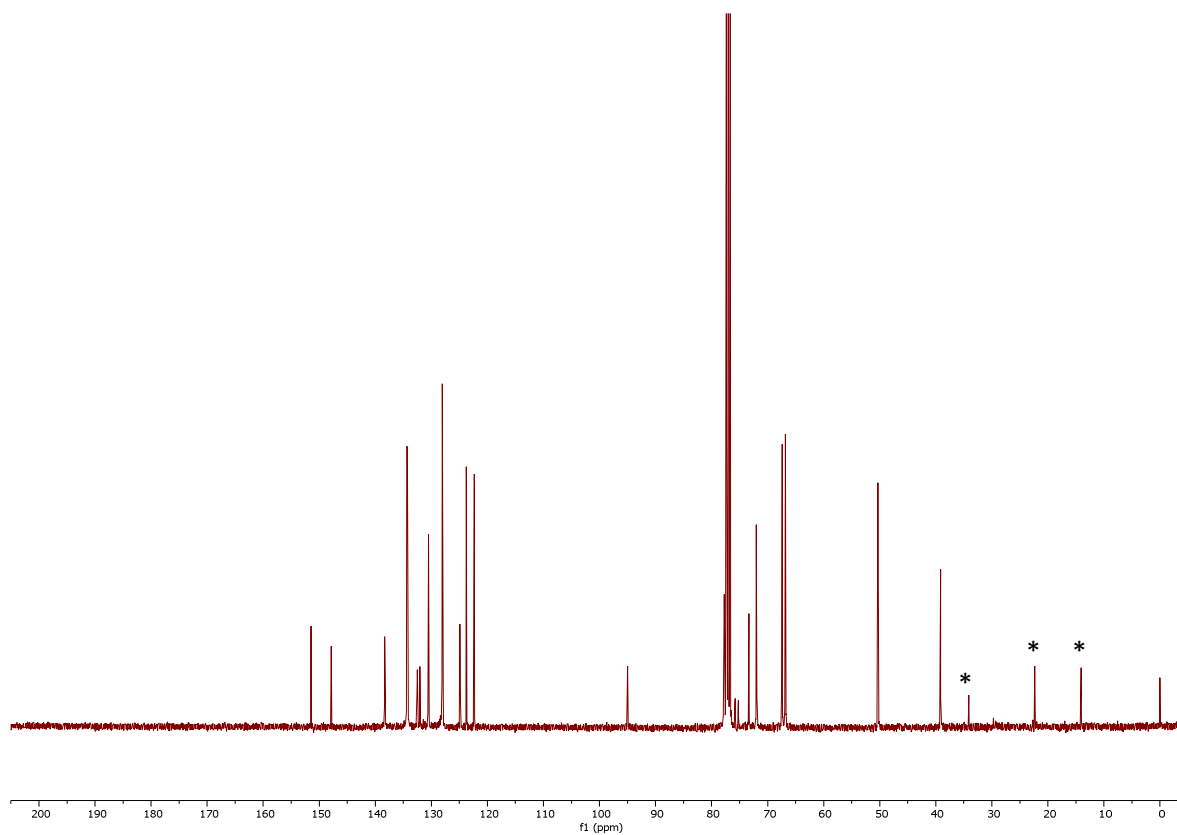

**Figure S24.**  $^{13}\text{C}\{^1\text{H}\}$  NMR (101 MHz,  $\text{CDCl}_3$ ) spectrum of **6** (signals marked with \* are due to residual pentane used to precipitate the product).

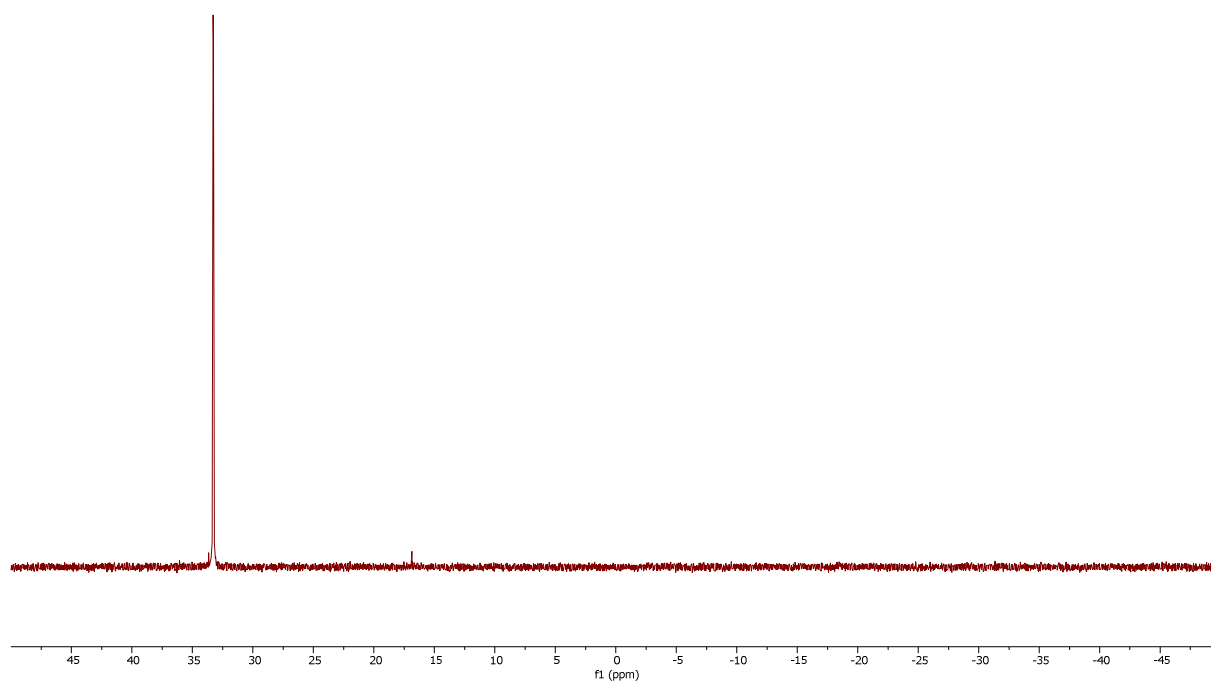

**Figure S25.**  $^{31}\text{P}\{^1\text{H}\}$  NMR (162 MHz,  $\text{CDCl}_3$ ) spectrum of **6**.

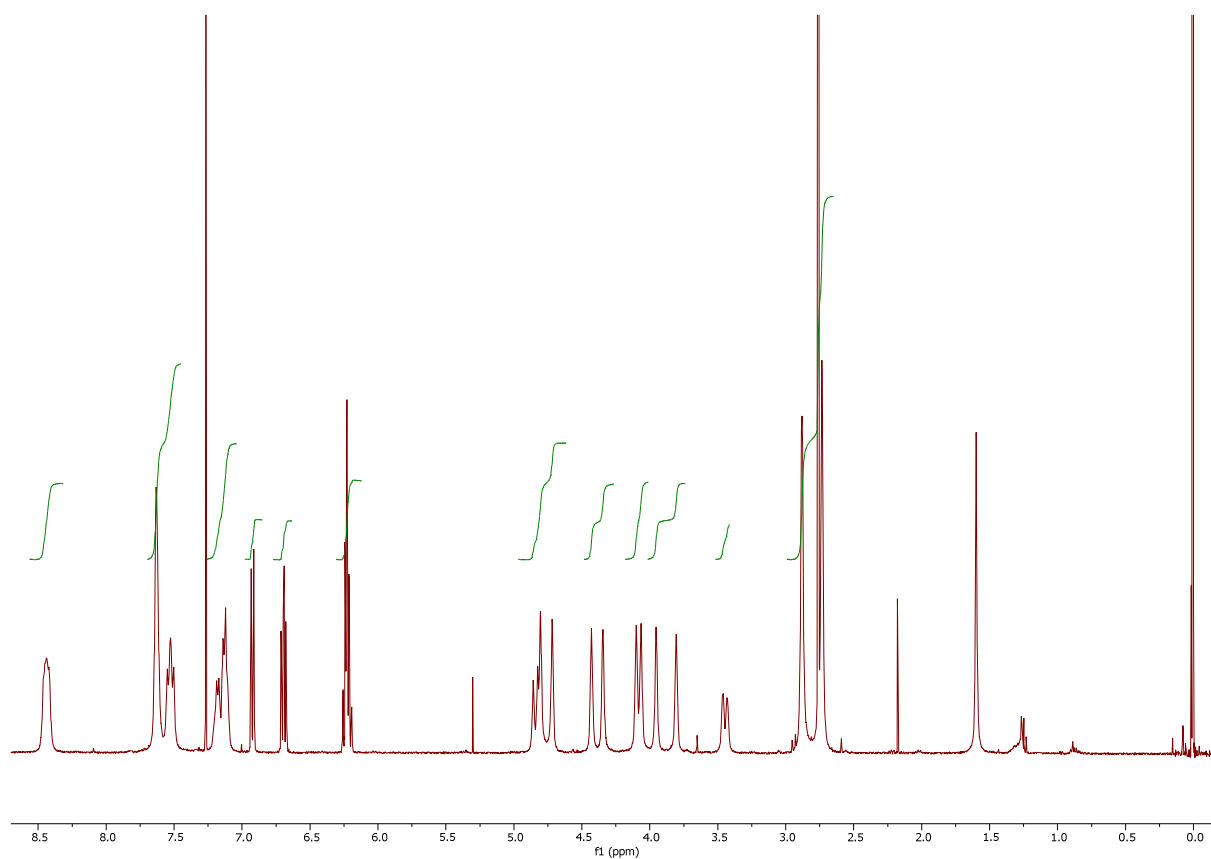

**Figure S26.**  $^1\text{H}$  NMR (400 MHz,  $\text{CDCl}_3$ ) spectrum of **7**.

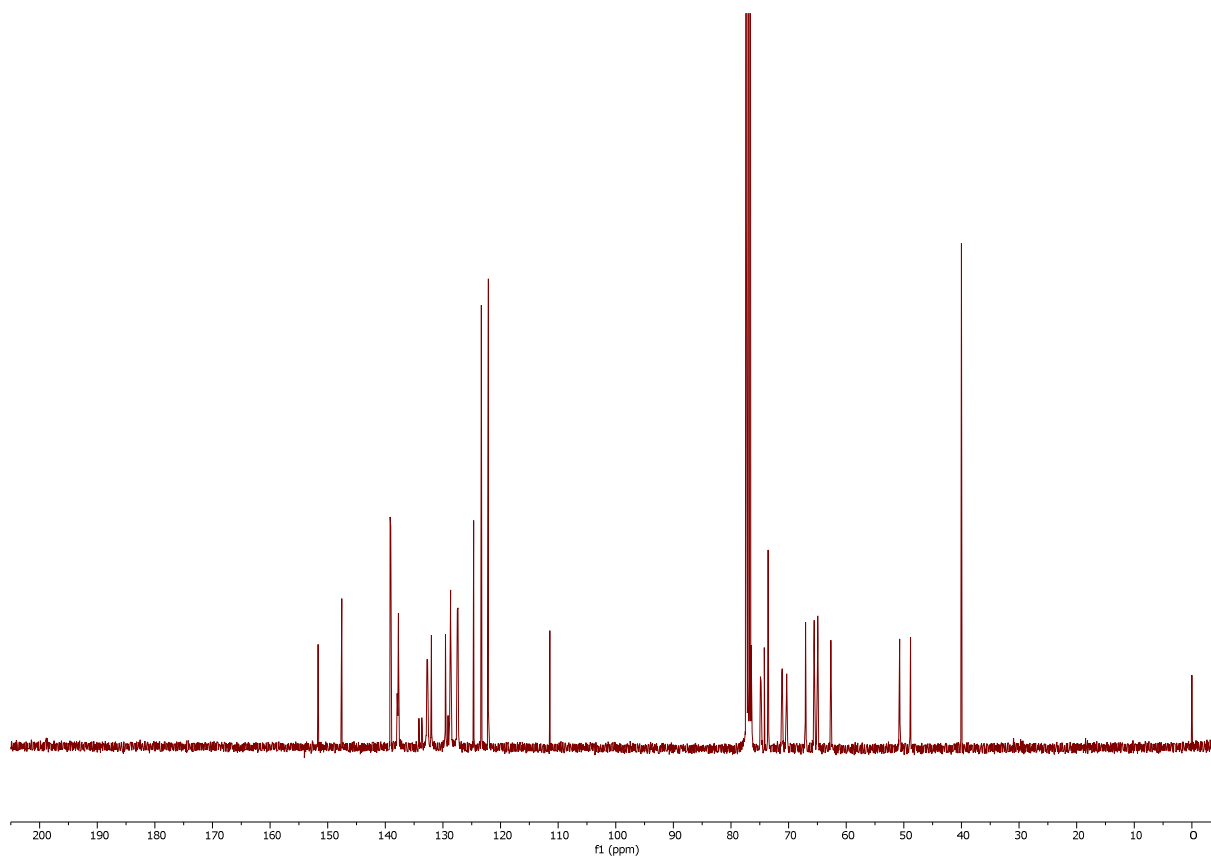

**Figure S27.**  $^{13}\text{C}\{^1\text{H}\}$  NMR (101 MHz,  $\text{CDCl}_3$ ) spectrum of **7**.

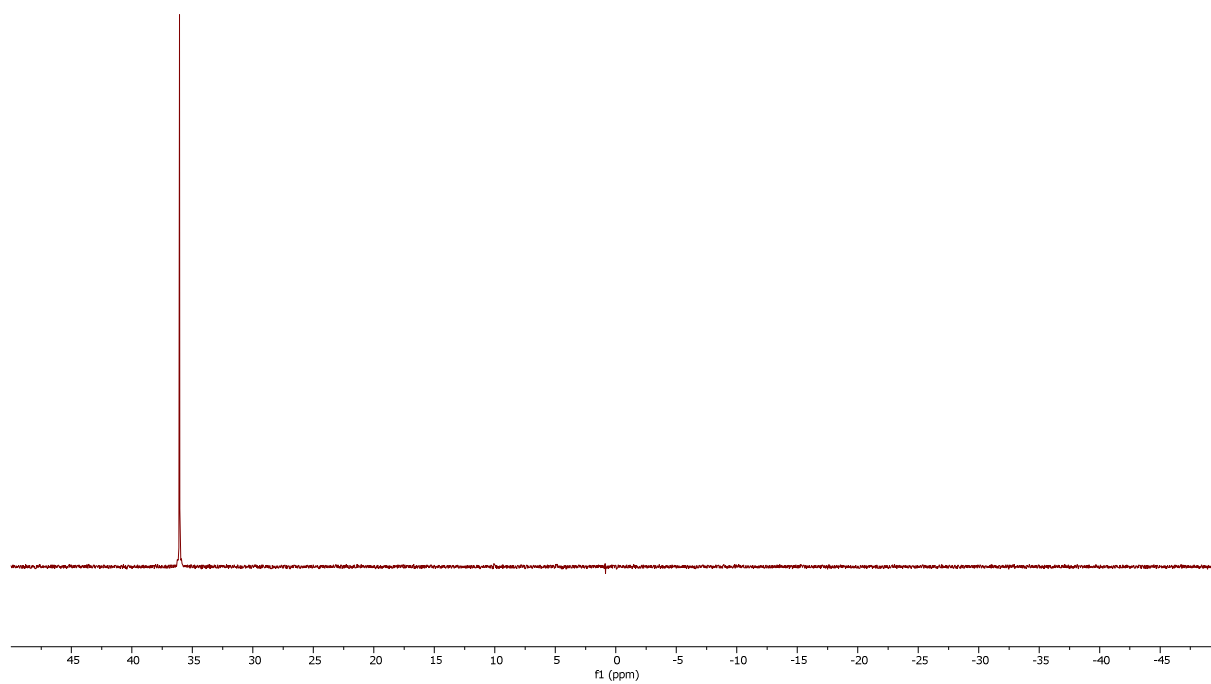

**Figure S28.**  $^{31}\text{P}\{^1\text{H}\}$  NMR (162 MHz,  $\text{CDCl}_3$ ) spectrum of **7**.
